# Supplementary material for: Targeted therapy for intractable cancer on the basis of molecular profiles: An open-label, phase II basket trial (Long March Pathway)
Source: Front Oncol. 2023 Feb 23;13:860711. doi: 10.3389/fonc.2023.860711 (PMC9995917; doi:10.3389/fonc.2023.860711)
Supplement: Supplementary File 2 — The frequency of the druggable gene alterations, including ALK, BRAF, BRCA1/2, CDK pathway (CDK4/6, CDKN2A/2B), EGFR, ERBB2, FGFR1/2/3, MET, PIK3CA, RET, and ROS, in different types of cancer. [file Table_1.xlsx]

## Sheet: Mutation in intractable cancer
	NSCLC（n=218）	Colorectal cancer (n=106)	Esophagogastric cancer(n=68)	Hepatocellular carcinoma(n=21)	Pancreatic cancer(n=20)	Breast cancer(n=19)	Sarcoma(n=14)	Ovarian cancer(n=9)	Kidney cancer(n=9)	Head and neck tumor(n=7)	SCLC (n=6)	Bladder cancer(n=5)	Cervical cancer(n=5)	Biliary tract cancer(n=5)	Melanoma(n=3)	Prostatic cancer(n=3)	Endometrial cancer(n=2)
ALK	0.0413	0.0283
BRAF	0.0138	0.0849				0.0526								0.2		0.3333
BRCA1/2	0.0138	0.0283		0.0476							0.1667
CDK pathway	0.1972	0.0094	0.1176	0.0476	0.2	0.1052	21.43%%	0.2222	0.1111	0.5715		0.4		0.4	0.3333
EGFR	0.4174	0.0189	0.0588	0.0476		0.0526			0.1111
ERBB2	0.0276	0.0566	0.0735			0.1579		0.1111
FGFR1/2/3			0.0147									0.4		0.2
KIT										0.1429	0.1667
MET	0.0275		0.0441
NTRK1/2/3	0.0092	0.0094	0.0147
PIK3CA	0.0596	0.1509	0.0735	0.0476	0.05	0.3684	0.0714	0.2222	0.1111			0.4			0.3333
RET	0.0092
ROS1	0.0275

## Sheet: Tier1or2 in intractable cancer
cancer_types	tier1or2	tier1	tier2	tier2_exclusive
Biliary system cancer	0	0	0	0
Bladder cancer	0.8	0.4	0.8	0.4
Breast carcinoma	0.733333	0.533333	0.266667	0.2
Colorectal cancer	0.324324	0.0675676	0.256757	0.256757
Head and neck cancer	0	0	0	0
Kidney cancer	0	0	0	0
Liver cancer	0.0588235	0	0.0588235	0.0588235
Malignant melanoma	0	0	0	0
Non small cell lung cancer	0.540107	0.454545	0.272727	0.0855615
Ovarian cancer	0	0	0	0
Pancreatic cancer	0.111111	0	0.111111	0.111111
Prostate carcinoma	0	0	0	0
Sarcoma	0.333333	0	0.333333	0.333333
Small cell lung cancer	0	0	0	0
Stomach cancer	0.263158	0.105263	0.175439	0.157895
Uterus cancer	0	0	0	0
