# Supplementary material for: Targeted therapy for intractable cancer on the basis of molecular profiles: An open-label, phase II basket trial (Long March Pathway)
Source: Front Oncol. 2023 Feb 23;13:860711. doi: 10.3389/fonc.2023.860711 (PMC9995917; doi:10.3389/fonc.2023.860711)
Supplement: Supplementary File 3 — Raw data on the frequency of the druggable gene alterations in 17,841 pan-cancer patients across 16 common tumor types [file Table_2.xlsx]

## Sheet: ALK
gene_type	cancer_types	SNV(%)	Del(%)	Fusion(%)	Amp_over5(%)	Amp_low5(%)
ALK	Non small cell lung cancer	4.33862	0.00962001	5.19481	0.00962001	0.21164
ALK	Small cell lung cancer	4.65116	0	0.332226	0	0.664452
ALK	Breast carcinoma	2.30999	0	0.149031	0	0.298063
ALK	Uterus cancer	6.84647	0	0	0	0.207469
ALK	Colorectal cancer	8.43298	0	0.440529	0	0.125865
ALK	Sarcoma	3.17848	0	0.733496	0.244499	0
ALK	Stomach cancer	4.5208	0	0	0.180832	0.45208
ALK	Biliary system cancer	3.27869	0	0	0	0
ALK	Ovarian cancer	3.5473	0	0.506757	0	2.19595
ALK	Liver cancer	3.125	0	0	0	0.3125
ALK	Malignant melanoma	1.63934	0	0	0	0.819672
ALK	Bladder cancer	6.30631	0	0	0	0
ALK	Head and neck cancer	1.97044	0	0.492611	0	0.492611
ALK	Prostate carcinoma	2.6087	0	0	0	0.869565
ALK	Pancreatic cancer	1.38504	0	0	0	0.277008
ALK	Kidney cancer	2.38095	0	0.47619	0	0.47619

## Sheet: CDK4
gene_type	cancer_types	SNV(%)	Del(%)	Fusion(%)	Amp_over5(%)	Amp_low5(%)
CDK4	Non small cell lung cancer	0.47138	0	0.0577201	2.1164	1.65464
CDK4	Small cell lung cancer	0	0	0	0	1.99336
CDK4	Colorectal cancer	0.566394	0	0	0	0.125865
CDK4	Kidney cancer	0.952381	0	0	0.47619	0
CDK4	Breast carcinoma	0.223547	0	0	0.968703	0.968703
CDK4	Stomach cancer	0.632911	0	0.0904159	0.542495	0.45208
CDK4	Malignant melanoma	1.63934	0	0	5.7377	2.45902
CDK4	Sarcoma	0.488998	0	0.488998	10.0244	2.20049
CDK4	Bladder cancer	0	0	0	0	3.6036
CDK4	Uterus cancer	1.24481	0	0	0.207469	0.414938
CDK4	Pancreatic cancer	0	0	0.277008	0.831025	0.831025
CDK4	Prostate carcinoma	0	0	0	0	0.869565
CDK4	Ovarian cancer	0.337838	0	0	0.168919	0.337838
CDK4	Head and neck cancer	1.47783	0	0	0.492611	0.492611
CDK4	Biliary system cancer	1.63934	0	0	1.0929	1.0929
CDK4	Liver cancer	0.3125	0	0	0	0.625

## Sheet: CDK6
gene_type	cancer_types	SNV(%)	Del(%)	Fusion(%)	Amp_over5(%)	Amp_low5(%)
CDK6	Non small cell lung cancer	0.596441	0	0.00962001	0.44252	0.836941
CDK6	Breast carcinoma	0.596125	0.0745156	0.0745156	0.223547	0.298063
CDK6	Stomach cancer	0.361664	0	0	2.53165	1.7179
CDK6	Colorectal cancer	0.94399	0	0	0.0629327	0.629327
CDK6	Liver cancer	0.9375	0	0	0.9375	0.625
CDK6	Uterus cancer	0.829876	0	0	0	0.207469
CDK6	Biliary system cancer	0.546448	0	0	1.63934	0
CDK6	Ovarian cancer	0.337838	0	0	0	0.506757
CDK6	Pancreatic cancer	0.277008	0	0	0.831025	1.10803
CDK6	Malignant melanoma	0.819672	0	0	0	2.45902
CDK6	Sarcoma	0.244499	0	0	0.488998	0.488998
CDK6	Small cell lung cancer	1.66113	0	0	0	0
CDK6	Head and neck cancer	0	0	0	0.492611	2.46305
CDK6	Prostate carcinoma	0	0	0	0	1.73913
CDK6	Kidney cancer	0	0	0	0.47619	0.47619
CDK6	Bladder cancer	0	0	0	0	0.900901

## Sheet: CDKN2A
gene_type	cancer_types	SNV(%)	Del(%)	Fusion(%)	Amp_over5(%)	Amp_low5(%)
CDKN2A	Small cell lung cancer	3.65449	1.99336	0	0.332226	1.3289
CDKN2A	Non small cell lung cancer	7.10919	3.50168	0.23088	0.00962001	0.13468
CDKN2A	Pancreatic cancer	19.1136	3.60111	0.277008	0	0
CDKN2A	Head and neck cancer	15.7635	7.38916	1.47783	0	0
CDKN2A	Stomach cancer	5.42495	4.15913	0.45208	0	0
CDKN2A	Breast carcinoma	2.08644	0.745156	0	0.298063	0.0745156
CDKN2A	Kidney cancer	0.952381	2.38095	0	0	0.47619
CDKN2A	Colorectal cancer	2.13971	0.377596	0.0629327	0	0
CDKN2A	Sarcoma	2.20049	7.82396	0.244499	0.244499	0
CDKN2A	Uterus cancer	2.90456	0.414938	0	0	0.207469
CDKN2A	Biliary system cancer	6.55738	2.73224	0.546448	0	0
CDKN2A	Liver cancer	3.75	3.125	0	0	0.3125
CDKN2A	Ovarian cancer	2.36486	0.506757	0.506757	0.168919	0.506757
CDKN2A	Malignant melanoma	0	17.2131	0.819672	0	0
CDKN2A	Bladder cancer	2.7027	12.6126	0	0	1.8018
CDKN2A	Prostate carcinoma	0.869565	0	0	0	0

## Sheet: CDKN2B
gene_type	cancer_types	SNV(%)	Del(%)	Fusion(%)	Amp_over5(%)	Amp_low5(%)
CDKN2B	Non small cell lung cancer	0.23088	2.78018	0	0.00962001	0.13468
CDKN2B	Head and neck cancer	0	4.4335	0	0	0
CDKN2B	Stomach cancer	0.45208	3.34539	0.0904159	0	0
CDKN2B	Pancreatic cancer	0	3.3241	0	0	0
CDKN2B	Kidney cancer	0	2.38095	0	0	0.47619
CDKN2B	Sarcoma	0	5.37897	0	0.244499	0
CDKN2B	Ovarian cancer	0.337838	0.675676	0	0.168919	0.168919
CDKN2B	Colorectal cancer	0.818125	0.251731	0	0	0
CDKN2B	Breast carcinoma	0.149031	0.447094	0	0.149031	0.298063
CDKN2B	Liver cancer	0	1.875	0	0	0
CDKN2B	Malignant melanoma	0.819672	10.6557	0	0	0
CDKN2B	Small cell lung cancer	0.664452	1.66113	0	0.332226	1.3289
CDKN2B	Biliary system cancer	0	1.63934	0	0	0
CDKN2B	Bladder cancer	0.900901	12.6126	0	0	2.7027
CDKN2B	Uterus cancer	0.829876	0.414938	0	0	0.414938
CDKN2B	Prostate carcinoma	0	0.869565	0	0	0

## Sheet: ERBB2
gene_type	cancer_types	SNV(%)	Del(%)	Fusion(%)	Amp_over5(%)	Amp_low5(%)
ERBB2	Non small cell lung cancer	5.21405	0.01924	0.0769601	0.856181	1.12554
ERBB2	Colorectal cancer	5.60101	0	0.251731	3.2725	1.25865
ERBB2	Head and neck cancer	2.46305	0	0	2.95567	1.97044
ERBB2	Stomach cancer	5.6962	0	0.542495	6.78119	2.62206
ERBB2	Breast carcinoma	3.8003	0	1.71386	14.7541	6.40835
ERBB2	Biliary system cancer	6.55738	0	0	7.10383	2.73224
ERBB2	Liver cancer	2.1875	0	0	0	0.3125
ERBB2	Uterus cancer	5.18672	0	0	2.07469	2.07469
ERBB2	Ovarian cancer	3.04054	0	0.168919	1.85811	1.68919
ERBB2	Pancreatic cancer	1.10803	0	0	0.831025	0.277008
ERBB2	Bladder cancer	9.00901	0	0.900901	6.30631	1.8018
ERBB2	Kidney cancer	1.42857	0	0	0	0
ERBB2	Small cell lung cancer	1.3289	0	0	0	0.332226
ERBB2	Prostate carcinoma	3.47826	0	0	0.869565	0
ERBB2	Sarcoma	0.733496	0	0	0	0.244499
ERBB2	Malignant melanoma	1.63934	0	0	0	0.819672

## Sheet: FGFR1
gene_type	cancer_types	SNV(%)	Del(%)	Fusion(%)	Amp_over5(%)	Amp_low5(%)
FGFR1	Non small cell lung cancer	1.38528	0.0865801	0.15392	1.24098	1.95286
FGFR1	Malignant melanoma	0.819672	0	1.63934	0.819672	2.45902
FGFR1	Small cell lung cancer	2.65781	0.664452	0.332226	2.65781	2.99003
FGFR1	Colorectal cancer	3.14663	0.188798	0.188798	1.25865	3.02077
FGFR1	Kidney cancer	0.952381	0	0	0	1.42857
FGFR1	Head and neck cancer	2.46305	0.492611	0	1.47783	2.95567
FGFR1	Pancreatic cancer	1.66205	0	0	0.554017	1.10803
FGFR1	Breast carcinoma	1.63934	0.149031	0.223547	5.51416	5.29061
FGFR1	Ovarian cancer	1.35135	0.168919	0	0.337838	1.18243
FGFR1	Uterus cancer	3.11203	0	0.207469	0.622407	2.07469
FGFR1	Stomach cancer	2.80289	0	0	0.45208	1.26582
FGFR1	Sarcoma	0.977995	0.244499	0.488998	1.22249	3.42298
FGFR1	Bladder cancer	2.7027	0	0	0.900901	3.6036
FGFR1	Liver cancer	0.9375	0.3125	0.3125	0	0.9375
FGFR1	Biliary system cancer	0.546448	0	0	0	3.27869
FGFR1	Prostate carcinoma	0.869565	0.869565	0	0	1.73913

## Sheet: FGFR2
gene_type	cancer_types	SNV(%)	Del(%)	Fusion(%)	Amp_over5(%)	Amp_low5(%)
FGFR2	Non small cell lung cancer	1.36604	0.0577201	0.11544	0.02886	0.0769601
FGFR2	Stomach cancer	1.80832	0	0.904159	3.34539	0.994575
FGFR2	Breast carcinoma	1.04322	0	0.745156	1.63934	1.4158
FGFR2	Colorectal cancer	3.0837	0	0.0629327	0.0629327	0.0629327
FGFR2	Malignant melanoma	0.819672	0	0	0	0.819672
FGFR2	Uterus cancer	5.60166	0	0	0	0.207469
FGFR2	Liver cancer	1.25	0.3125	2.5	0	0
FGFR2	Ovarian cancer	2.02703	0	0.168919	0.337838	2.19595
FGFR2	Sarcoma	0.733496	0.244499	0	0.244499	0.244499
FGFR2	Bladder cancer	5.40541	0	0	0	0
FGFR2	Biliary system cancer	2.73224	0	1.0929	0.546448	0
FGFR2	Small cell lung cancer	0.996678	0.332226	0	0	0.332226
FGFR2	Head and neck cancer	0.492611	0	0	0	0
FGFR2	Pancreatic cancer	0.554017	0	0	0.277008	0.277008
FGFR2	Prostate carcinoma	0.869565	0	0	0	0
FGFR2	Kidney cancer	0.47619	0	0	0	0

## Sheet: FGFR3
gene_type	cancer_types	SNV(%)	Del(%)	Fusion(%)	Amp_over5(%)	Amp_low5(%)
FGFR3	Small cell lung cancer	0.664452	0.996678	0	0	0.664452
FGFR3	Stomach cancer	2.07957	0	0.361664	0	0.632911
FGFR3	Non small cell lung cancer	1.51996	0.00962001	0.23088	0.0962001	0.529101
FGFR3	Colorectal cancer	2.39144	0.0629327	0.251731	0.0629327	0.629327
FGFR3	Breast carcinoma	0.894188	0	0.149031	0.149031	1.19225
FGFR3	Ovarian cancer	1.35135	0	0.168919	0.168919	3.88514
FGFR3	Uterus cancer	2.6971	0	0.414938	0.207469	1.24481
FGFR3	Prostate carcinoma	2.6087	0	0	0	2.6087
FGFR3	Head and neck cancer	2.46305	0	0	0	0.492611
FGFR3	Sarcoma	0.244499	0	0	0.244499	1.95599
FGFR3	Pancreatic cancer	0.554017	0	0	0.554017	0.277008
FGFR3	Malignant melanoma	1.63934	0	0	0	1.63934
FGFR3	Liver cancer	0.3125	0	0.3125	0.3125	1.25
FGFR3	Biliary system cancer	0	0	0	1.0929	1.0929
FGFR3	Bladder cancer	12.6126	0	1.8018	1.8018	2.7027
FGFR3	Kidney cancer	2.38095	0	0	0	1.42857

## Sheet: PIK3CA
gene_type	cancer_types	SNV(%)	Del(%)	Fusion(%)	Amp_over5(%)	Amp_low5(%)
PIK3CA	Colorectal cancer	17.0548	0	0	0	0.314663
PIK3CA	Non small cell lung cancer	6.97451	0	0.0577201	1.30832	4.1366
PIK3CA	Breast carcinoma	40.9836	0	0	0.670641	1.71386
PIK3CA	Small cell lung cancer	4.98339	0	0	0.332226	7.97342
PIK3CA	Ovarian cancer	11.9932	0	0	0.675676	8.10811
PIK3CA	Uterus cancer	35.6846	0	0	0.622407	4.56432
PIK3CA	Sarcoma	4.88998	0	0	0	0.977995
PIK3CA	Stomach cancer	9.49367	0	0	0.632911	2.44123
PIK3CA	Biliary system cancer	4.91803	0	0	0	0
PIK3CA	Head and neck cancer	7.88177	0	0	1.47783	3.44828
PIK3CA	Pancreatic cancer	3.3241	0	0	0	0.831025
PIK3CA	Liver cancer	5	0	0	0	0.3125
PIK3CA	Kidney cancer	5.2381	0	0	0	0.47619
PIK3CA	Bladder cancer	12.6126	0	0	0.900901	0.900901
PIK3CA	Malignant melanoma	5.7377	0	0	0	0
PIK3CA	Prostate carcinoma	6.08696	0	0	0	0

[truncated: 3 more sheets: MET, RET, ROS1]
